# Supplementary material for: Inflammatory Monocytes and Neutrophils Regulate Streptococcus suis-Induced Systemic Inflammation and Disease but Are Not Critical for the Development of Central Nervous System Disease in a Mouse Model of Infection
Source: PubMed Central journal article supplement (PMC7035915; doi:10.1128/iai.00787-19), 2020-02-20
Supplement: zii999093003s1.pdf [file zii999093003s1.pdf]

**Table S1. Percentage of neutrophils in peripheral blood following treatment with anti-Ly6G neutralizing antibody or its isotype control.**

| Treatment       | Time post-injection (h) |            |            |
|-----------------|-------------------------|------------|------------|
|                 | 24                      | 48         | 72         |
| Isotype Control | 7.8 ± 0.2               | 7.2 ± 0.6  | 7.6 ± 0.4  |
| Anti-Ly6G       | 0.8 ± 0.3*              | 0.9 ± 0.4* | 1.0 ± 0.3* |

Data represent mean ± SEM (n = 3). \* ( $p < 0.05$ ) indicates a significant difference between groups as determined using the Mann-Whitney rank sum test.

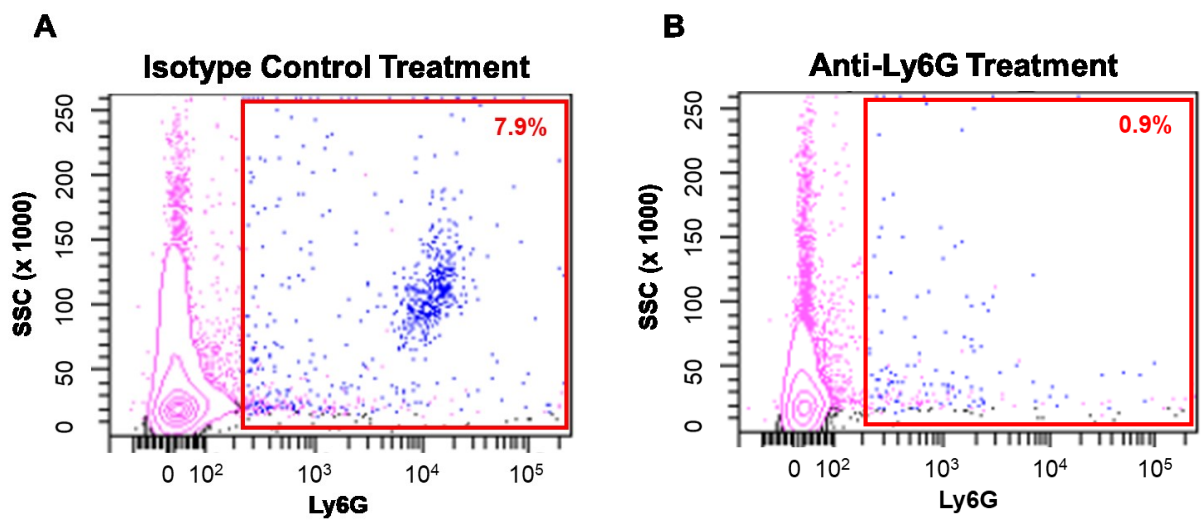

**Fig. S1. Efficiency of *in vivo* neutrophil depletion.** Wild-type mice were pre-treated with either isotype control (mock-treated) (A) or anti-Ly6G monoclonal neutralizing antibody (B) and peripheral blood was collected 48 h following injection. Cells were stained with FITC-conjugated anti-Ly6G. Representative dot plots showing neutrophil percentages in mock-treated or anti-Ly6G-treated mice as analyzed by flow cytometry.

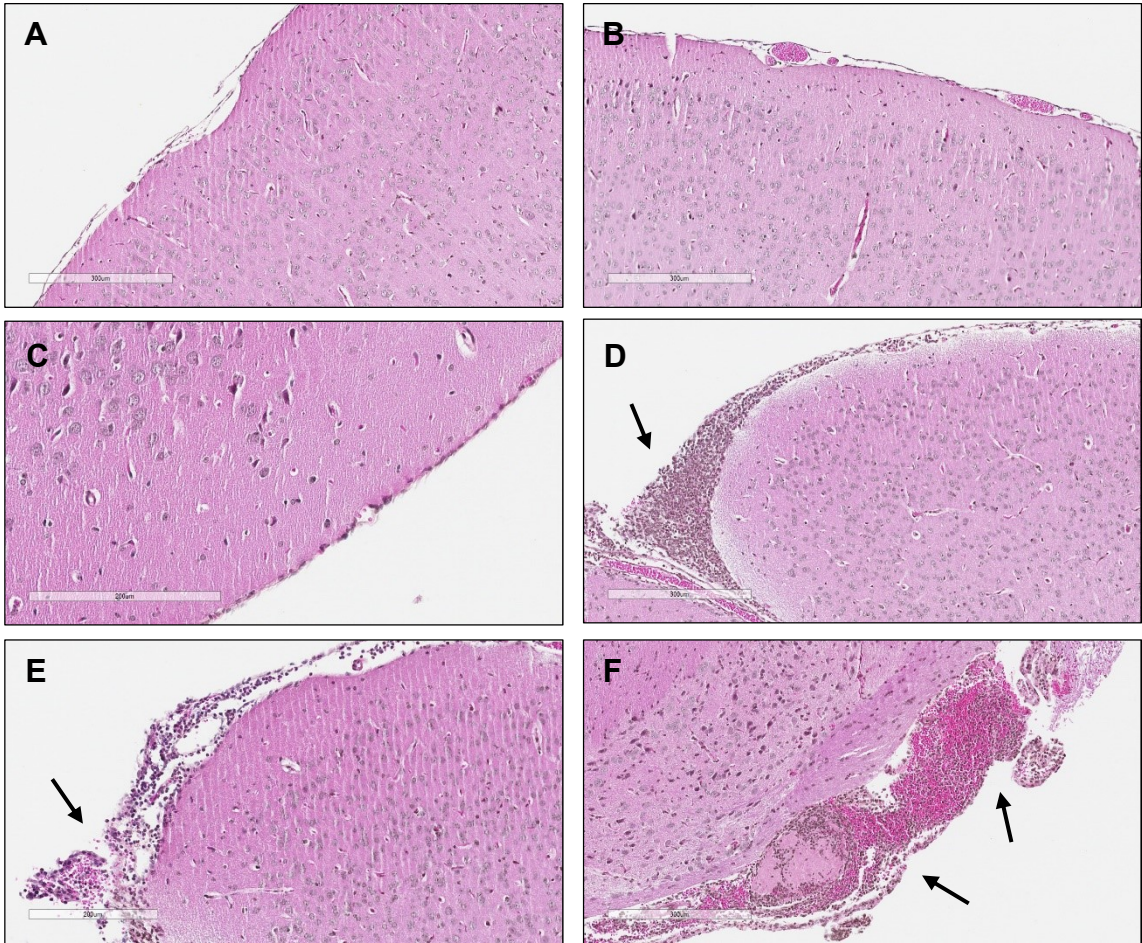

**Fig. S2. Histopathological lesions of *S. suis*-induced central nervous system (CNS) disease in the absence of inflammatory or patrolling monocytes.** Representative micrographs of the brain of mock-infected wild-type (A), CCR2<sup>-/-</sup> (B) and Nr4a1<sup>-/-</sup> (C) mice [absence of histopathological lesions in A, B and C] or wild-type [suppuration and leukocyte infiltration] (D), CCR2<sup>-/-</sup> [suppuration and leukocyte infiltration] (E) and Nr4a1<sup>-/-</sup> [suppuration, leukocyte infiltration and hemorrhaging] (F) mice infected with a standard dose of *S. suis* (1 x 10<sup>5</sup> CFU) by intracisternal inoculation. Brains were collected upon presentation of clinical CNS disease or at the end of the experiment (24 h post-infection). Black arrowheads indicate lesions of *S. suis*-induced CNS disease.

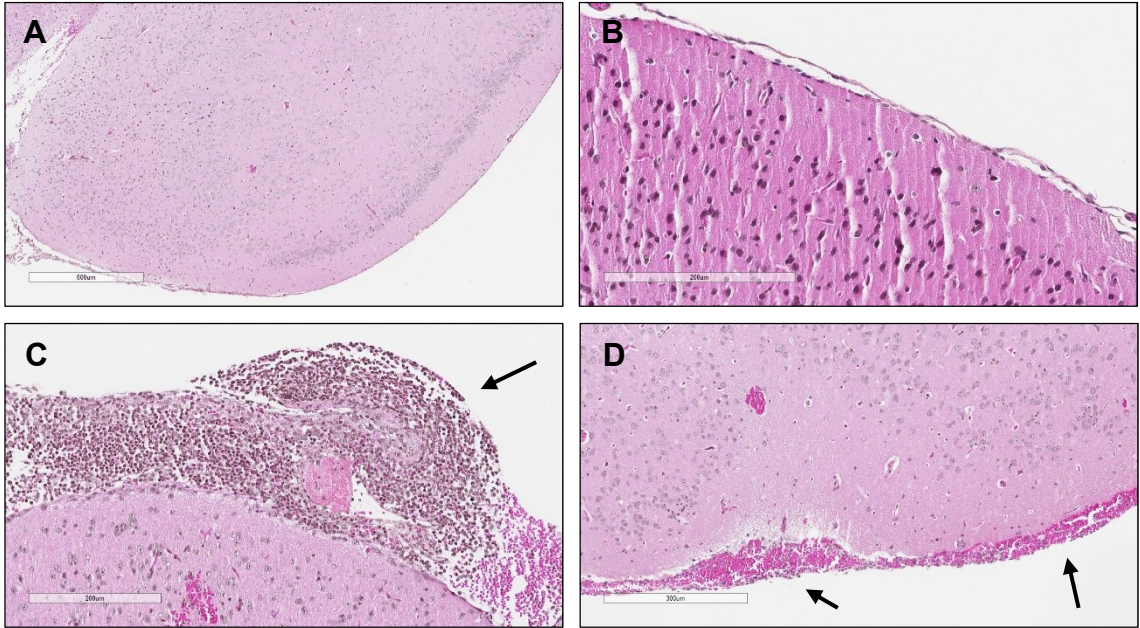

**Fig. S3. Histopathological lesions of *S. suis*-induced central nervous system (CNS) disease following neutrophil depletion.** Representative micrographs of the brain of mock-infected wild-type mice pre-treated with either isotype control (**A**) or anti-Ly6G neutralizing antibody (**B**) [absence of histopathological lesions in **A** and **B**] or wild-type mice pre-treated with either isotype control [suppuration and leukocyte infiltration] (**C**) or anti-Ly6G neutralizing antibody [leukocyte infiltration and hemorrhaging] (**D**) mice infected with a standard dose of *S. suis* ( $1 \times 10^5$  CFU) by intracisternal inoculation. Brains were collected upon presentation of clinical CNS disease or at the end of the experiment (24 h post-infection). Black arrowheads indicate lesions typical of *S. suis*-induced CNS disease.

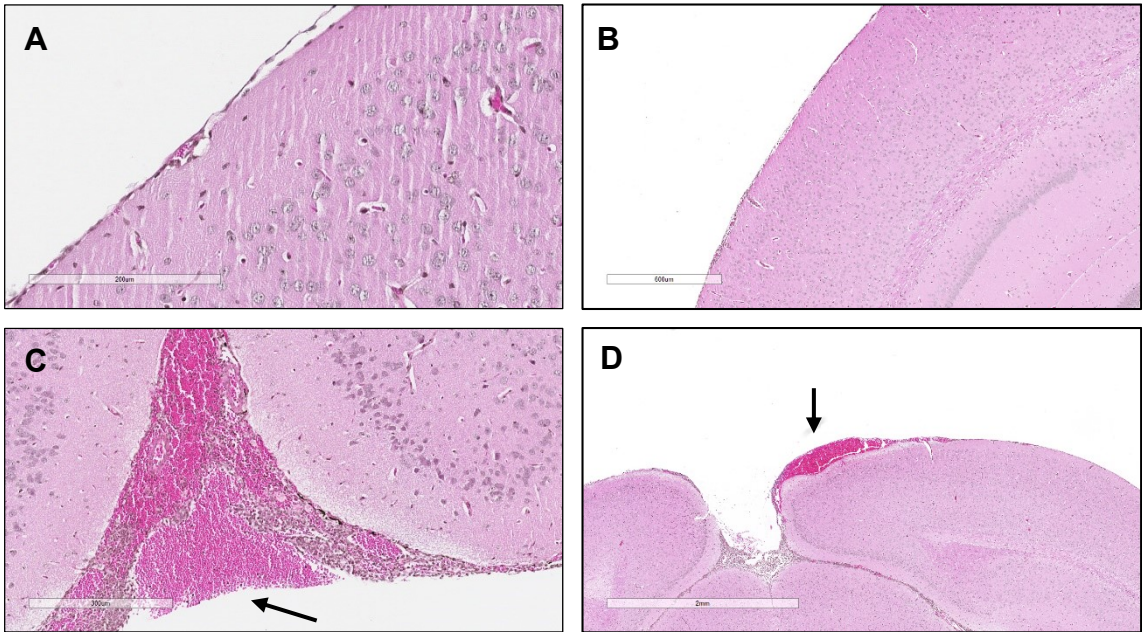

**Fig. S4. Histopathological lesions of *S. suis*-induced central nervous system (CNS) disease following neutrophil depletion in the absence of inflammatory monocytes.** Representative micrographs of the brain of mock-infected *CCR2*<sup>-/-</sup> mice pre-treated with either isotype control (**A**) or anti-Ly6G neutralizing antibody (**B**) [absence of histopathological lesions in **A** and **B**] or *CCR2*<sup>-/-</sup> mice pre-treated with either isotype control [suppuration and leukocyte infiltration] (**C**) or anti-Ly6G neutralizing antibody [leukocyte infiltration and hemorrhaging] (**D**) infected with a standard dose of *S. suis* ( $1 \times 10^5$  CFU) by intracisternal inoculation. Brains were collected upon presentation of clinical CNS disease or at the end of the experiment (24 h post-infection). Black arrowheads indicate lesions typical of *S. suis*-induced CNS disease.

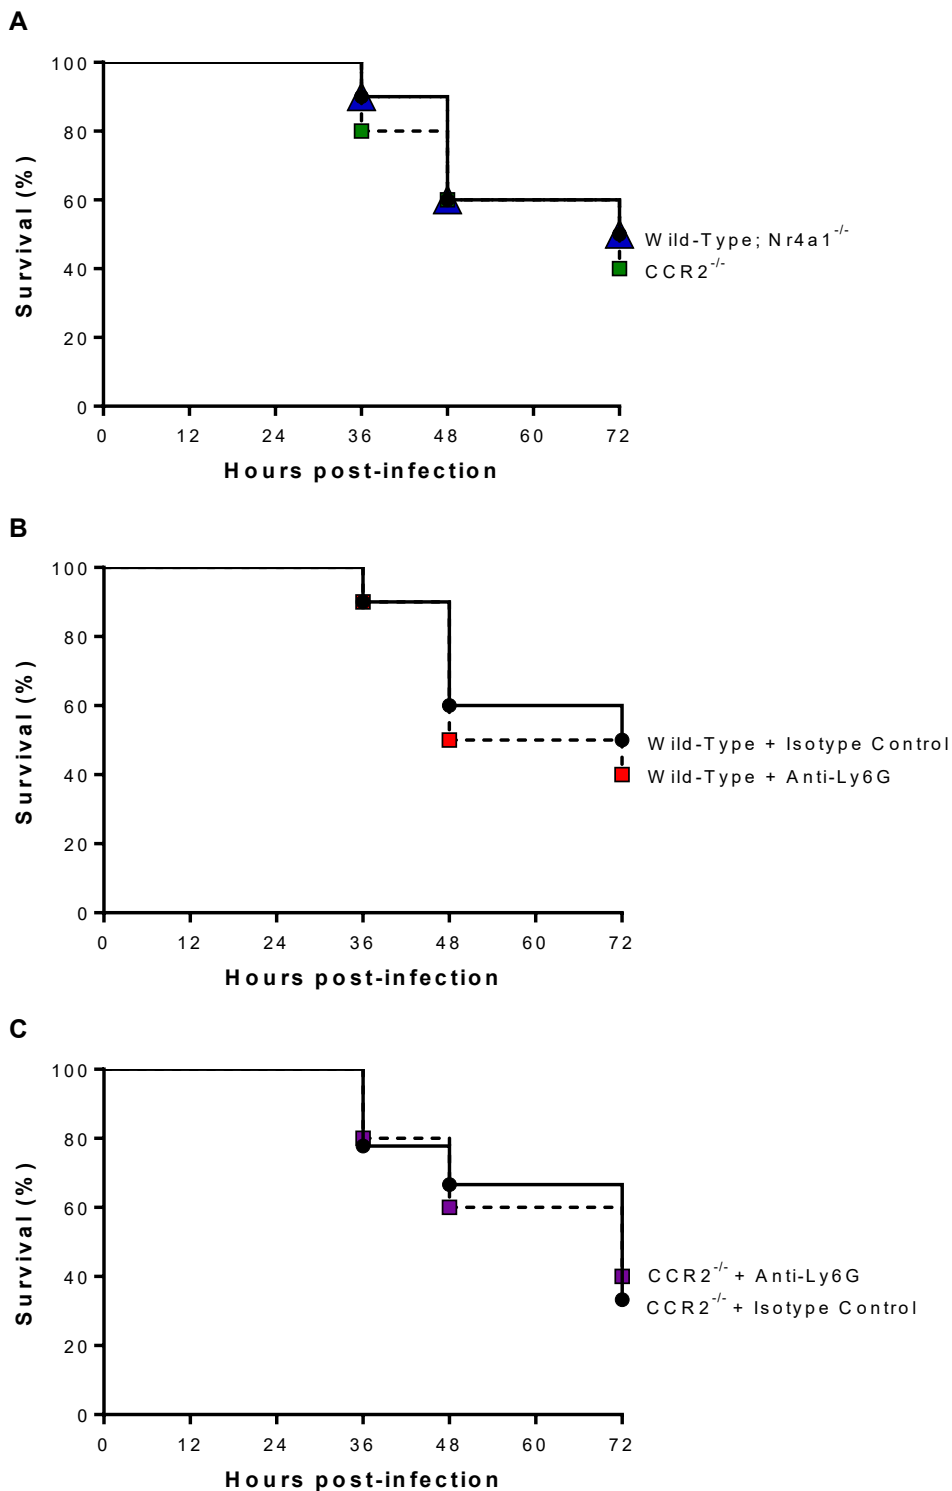

**Fig. S5. Monocytes and neutrophils are not required for the development of clinical central nervous system (CNS) disease following infection with a low dose of *S. suis*.** Survival of wild-type (black), CCR2<sup>-/-</sup> (green) or Nr4a1<sup>-/-</sup> (blue) mice (A), wild-type mice pre-treated with either isotype control (black) or anti-Ly6G neutralizing antibody (red) (B) or CCR2<sup>-/-</sup> mice pre-treated with either isotype control (black) or anti-Ly6G neutralizing antibody (purple) (C) following intracisternal infection with 10 CFU of *S. suis*. Data represent survival curves of mice euthanized upon presentation of clinical signs of CNS disease (n = 10). Statistical differences were analyzed using the Log-rank (Mantel-Cox) test.

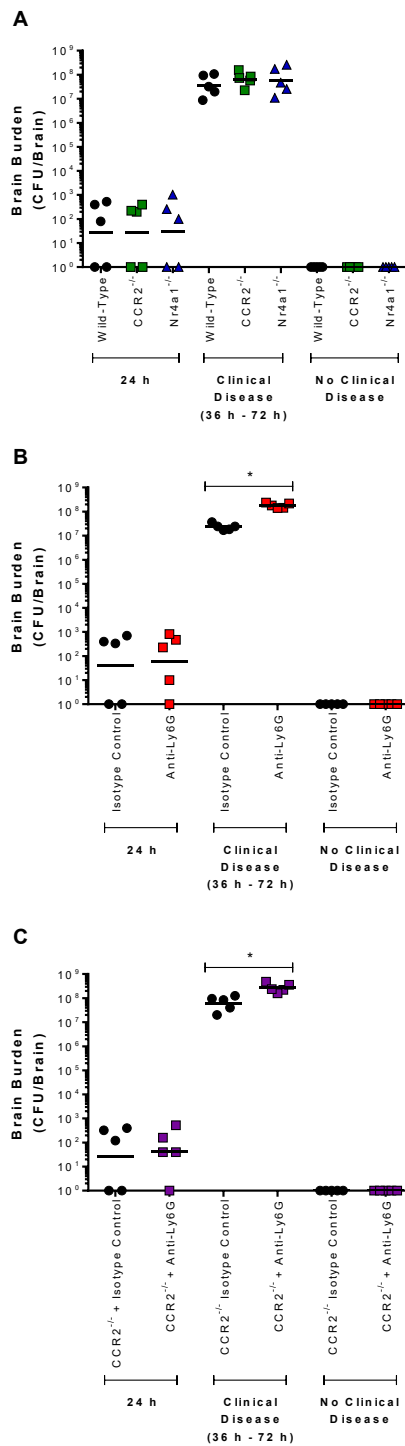

**Fig. S6. Neutrophils but not monocytes participate in brain bacterial burden control following infection with a low dose of *S. suis*.** Brain bacterial burden of wild-type, CCR2<sup>-/-</sup> or Nr4a1<sup>-/-</sup> mice, wild-type mice pre-treated with either isotype control or anti-Ly6G neutralizing antibody or CCR2<sup>-/-</sup> mice pre-treated with either isotype control or anti-Ly6G neutralizing antibody 24 h following intracisternal infection with 10 CFU of *S. suis*, upon presentation of clinical central nervous system disease or at the end of the infection (no clinical disease). Data represent geometric mean (n = 5). \* ( $p < 0.05$ ) indicates a significant difference between blood bacterial burden of isotype control- and anti-Ly6G-treated mice (wild-type or CCR2<sup>-/-</sup>) as determined using the Mann-Whitney rank sum test.

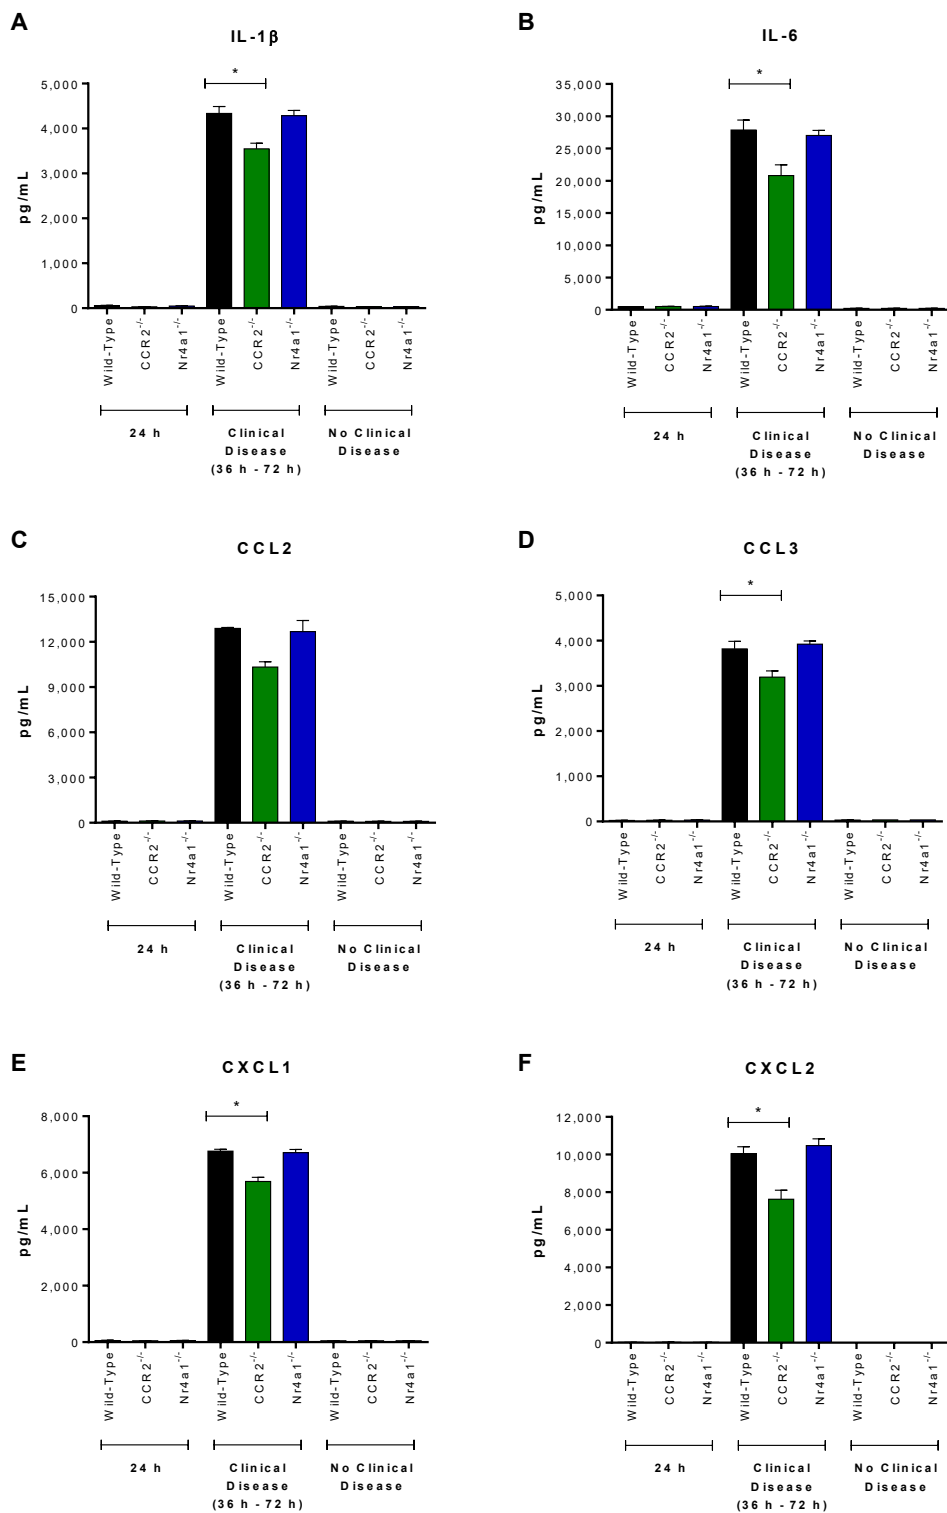

**Fig. S7. Inflammatory but not patrolling monocytes contribute to *S. suis*-induced central nervous system (CNS) inflammation following infection with a low bacterial dose.** Brain levels of IL-1 $\beta$  (A), IL-6 (B), CCL2 (C), CCL3 (D), CXCL1 (E), and CXCL2 (F) in wild-type, CCR2<sup>-/-</sup> or Nr4a1<sup>-/-</sup> mice 24 h following intracisternal infection with 10 CFU of *S. suis*, upon presentation of clinical CNS disease or at the end of the infection (no clinical disease). Data represent mean  $\pm$  SEM (n = 5). \* ( $p < 0.05$ ) indicates a significant difference in mediator levels between wild-type and CCR2<sup>-/-</sup> mice as determined using the unpaired t-test.



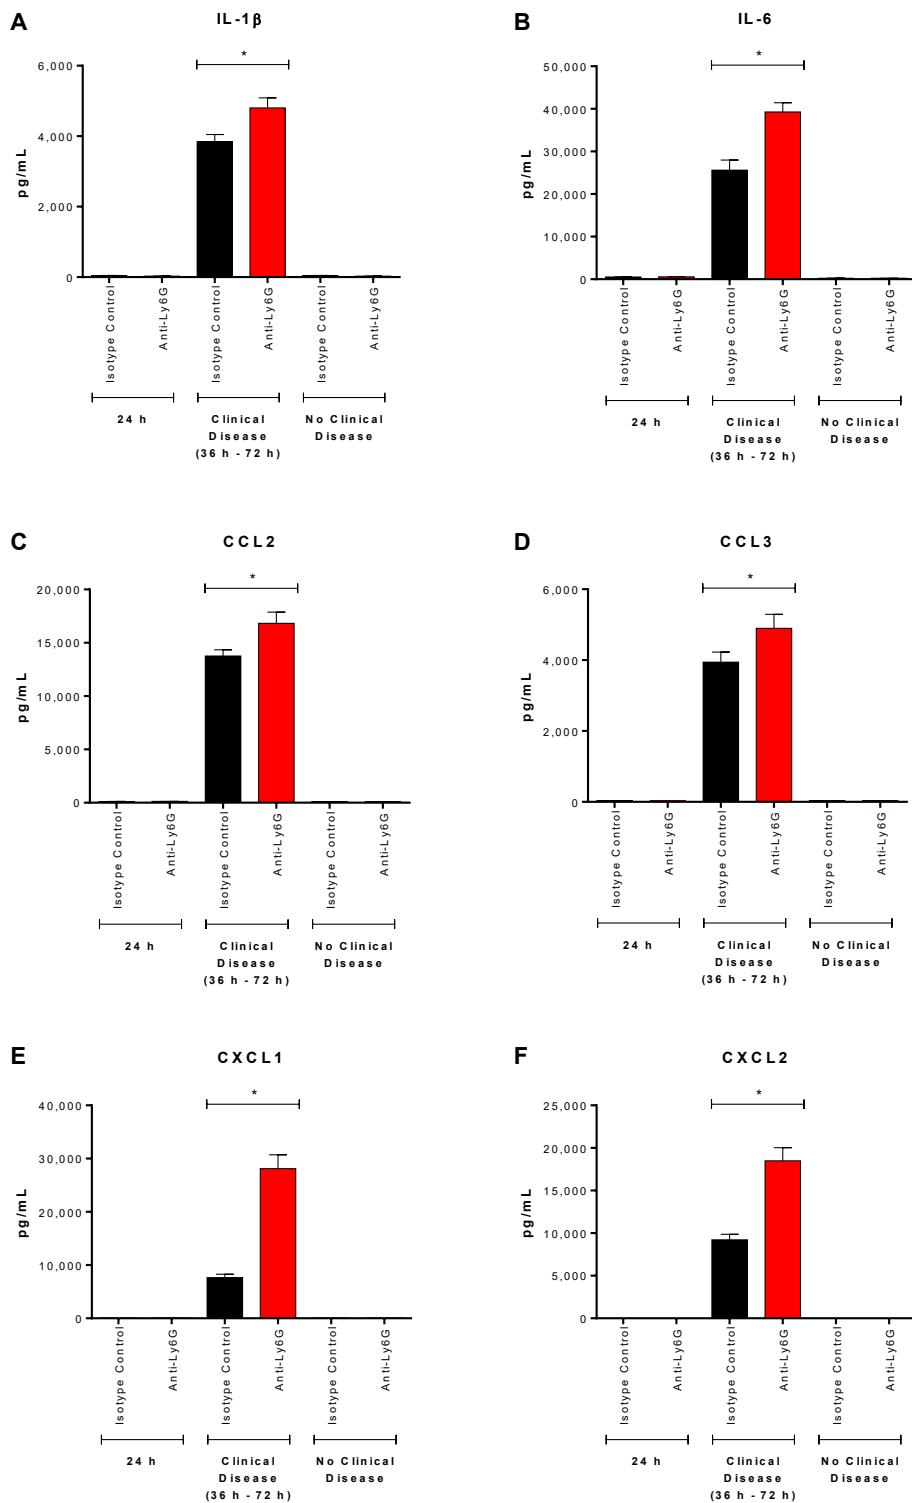

**Fig. S8. Presence of neutrophils modulates *S. suis*-induced central nervous system (CNS) inflammation following infection with a low bacterial dose.** Brain levels of IL-1 $\beta$  (A), IL-6 (B), CCL2 (C), CCL3 (D), CXCL1 (E), and CXCL2 (F) in wild-type mice pre-treated with either isotype control or anti-Ly6G neutralizing antibody 24 h following intracisternal infection with 10 CFU of *S. suis*, upon presentation of clinical CNS disease or at the end of the infection (no clinical disease). Data represent mean  $\pm$  SEM (n = 5). \* ( $p < 0.05$ ) indicates a significant difference in mediator levels between isotype control- and anti-Ly6G-treated mice as determined using the unpaired t-test.

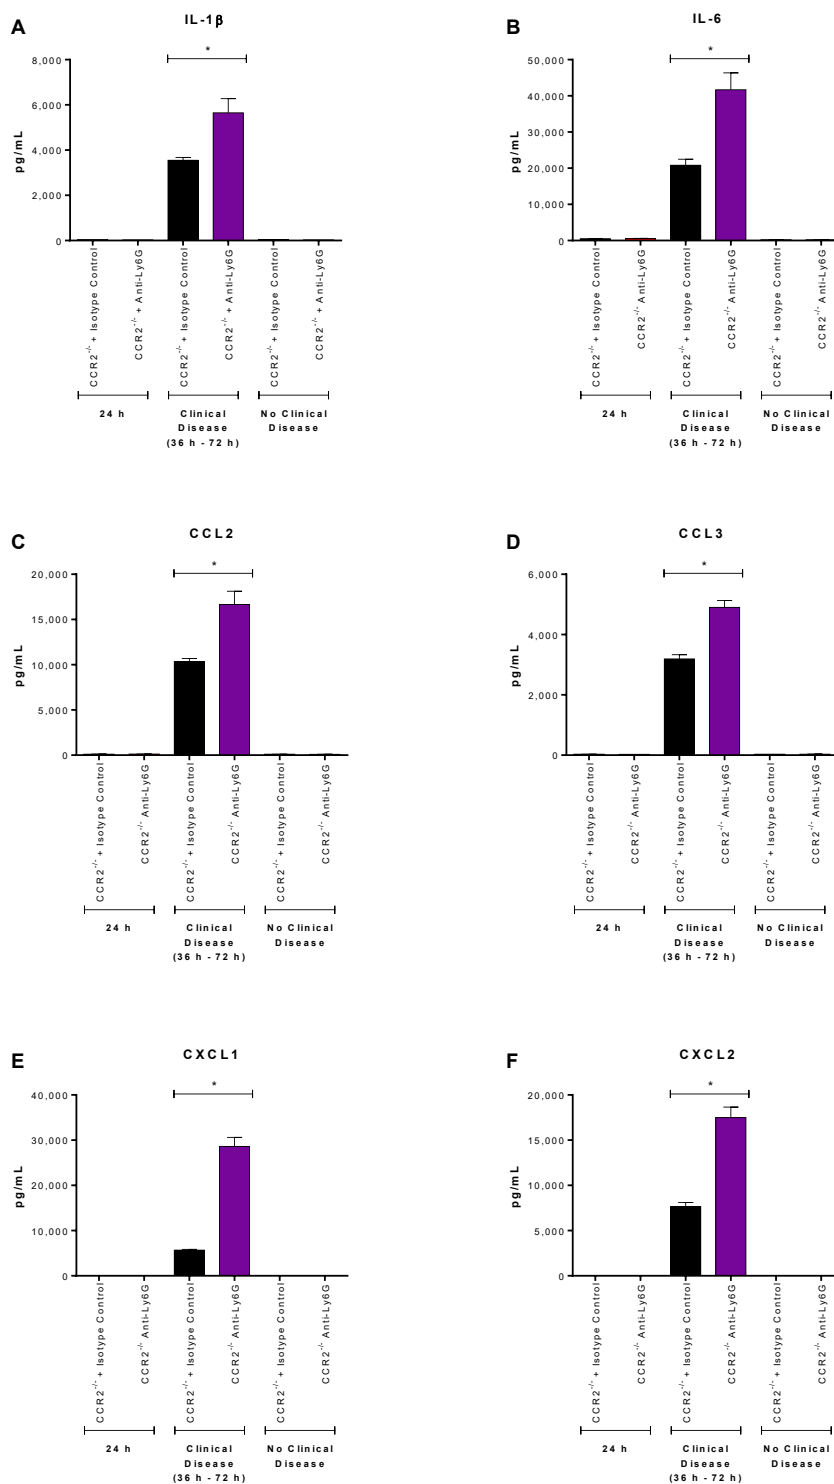

**Fig. S9. Neutrophils modulate *S. suis*-induced central nervous system (CNS) inflammation even in the absence of inflammatory monocytes following infection with a low bacterial dose.** Brain levels of IL-1 $\beta$  (A), IL-6 (B), CCL2 (C), CCL3 (D), CXCL1 (E), and CXCL2 (F) in CCR2<sup>-/-</sup> mice pre-treated with either isotype control or anti-Ly6G neutralizing antibody mice following intracisternal mock-infection or 6 h following infection with 10 CFU of *S. suis* or upon presentation of clinical CNS disease. Data represent mean  $\pm$  SEM (n = 5). \* ( $p < 0.05$ ) indicates a significant difference in mediator levels between isotype control- and anti-Ly6G-treated mice as determined using the unpaired t-test.
